# Supplementary material
Source: PubMed Central journal article supplement (PMC3339997)
Supplement: supp_M112.341248_jbc.M112.341248-1.pdf [file supp_M112.341248_jbc.M112.341248-1.pdf]

## **Supplemental Data.**

### **Supplemental Figure 1.**

#### **Figure Legends**

##### **Figure S1A.**

Raw Cells were co-transfected with 4 $\mu$ g GFP-MyIip/Idol (green) and Cnnpy2/Msap-dsRed (red color) for 24h and visualized using a fluorescent microscope. Note co-localization of the two proteins in the merge picture to the right (yellow color).

##### **Figure S1B-C.**

Raw cells were loaded with acetylated LDL (AcLDL) for 24h (Fig S1B) and then stimulated with 50ng/ml for additional 24h followed by immunoblotting for LDLR. No change in LDLR levels by FGF21 was observed in cholesterol loaded macrophages (Fig S1C).

##### **Figure S1D.**

Raw cells were loaded with unmodified LDL for 24h and then stimulated with 50ng/ml FGF21 for an additional 24h. Cellular cholesterol ester deposition was imaged and quantified by Oil Red O staining using colorimetry as described in Methods. FGF21 increased the lipid content in control but not in cholesterol-loaded macrophages. Values are means  $\pm$  SD, n=3.  
\*\* P < 0.01 and \*\*\* P < 0.001 for treated cells vs. untreated controls.
